# Supplementary material for: Simultaneous Estimation of Cinnamaldehyde and Eugenol in Essential Oils and Traditional and Ultrasound-Assisted Extracts of Different Species of Cinnamon Using a Sustainable/Green HPTLC Technique
Source: PubMed Central journal article supplement (PMC8038348; doi:10.3390/molecules26072054), 2021-04-03
Supplement: molecules-26-02054-s001.pdf [file molecules-26-02054-s001.pdf]

## Supplementary materials

# Simultaneous Estimation of Cinnamaldehyde and Eugenol in Essential Oils and Traditional and Ultrasound-Assisted Extracts of Different Species of Cinnamon Using a Sustainable/Green HPTLC Technique

Ahmed I. Foudah<sup>1</sup>, Faiyaz Shakeel<sup>2</sup>, Mohammed H. Alqarni<sup>1</sup>, Samir A. Ross<sup>3,4</sup>, Mohammad A. Salkini<sup>1</sup> and Prawez Alam<sup>1\*</sup>

<sup>1</sup> Department of Pharmacognosy, College of Pharmacy, Prince Sattam Bin Abdulaziz University, Al-Kharj 11942, Saudi Arabia; [a.foudah@psau.edu.sa](mailto:a.foudah@psau.edu.sa) (A.I.F.); [m.alqarni@psau.edu.sa](mailto:m.alqarni@psau.edu.sa) (M.H.A.); [m.salkini@psau.edu.sa](mailto:m.salkini@psau.edu.sa) (M.A.S.)

<sup>2</sup> Department of Pharmaceutics, College of Pharmacy, King Saud University, Riyadh 11451, Saudi Arabia; [faiyazs@fastmail.fm](mailto:faiyazs@fastmail.fm) (F.S.)

<sup>3</sup> National Center for Natural Products Research, University of Mississippi, Oxford, MS 38677, USA; [sroos@olemiss.edu](mailto:sroos@olemiss.edu) (S.A.R.)

<sup>4</sup> Department of Biomolecular Sciences, School of Pharmacy, University of Mississippi, Oxford, MS 38677, USA

\* Correspondence: [p.alam@psau.edu.sa](mailto:p.alam@psau.edu.sa) (P.A.)

**Table S1.** Chromatographic conditions and instrumentations used for the simultaneous estimation of CCHO and EOH for the sustainable HPTLC techniques.

| Chromatographic conditions/instrumentation | CCHO                                                                                                       | EOH                                                                                                        |
|--------------------------------------------|------------------------------------------------------------------------------------------------------------|------------------------------------------------------------------------------------------------------------|
| Instrument                                 | CAMAG TLC system (CAMAG, Muttenz, Switzerland)                                                             | CAMAG TLC system (CAMAG, Muttenz, Switzerland)                                                             |
| Software                                   | WinCAT's (version 1.4.3.6336, CAMAG, Muttenz, Switzerland)                                                 | WinCAT's (version 1.4.3.6336, CAMAG, Muttenz, Switzerland)                                                 |
| Syringe for sample application             | CAMAG microliter Syringe (Hamilton, Bonaduz, Switzerland)                                                  | CAMAG microliter Syringe (Hamilton, Bonaduz, Switzerland)                                                  |
| TLC plates/stationary phase                | 10 x 20 cm glass backed plates pre-coated with NP silica gel 60 F254S plates (E-Merck, Darmstadt, Germany) | 10 x 20 cm glass backed plates pre-coated with NP silica gel 60 F254S plates (E-Merck, Darmstadt, Germany) |
| Gas for sample application                 | Nitrogen                                                                                                   | Nitrogen                                                                                                   |
| Development chamber                        | CAMAG automatic developing chamber 2 (ADC2) (CAMAG, Muttenz, Switzerland)                                  | CAMAG automatic developing chamber 2 (ADC2) (CAMAG, Muttenz, Switzerland)                                  |

|                               |                                                     |                                                     |
|-------------------------------|-----------------------------------------------------|-----------------------------------------------------|
| Chamber saturation time       | 30 min                                              | 30 min                                              |
| TLC Scanner                   | CAMAG TLC scanner-III (CAMAG, Muttenz, Switzerland) | CAMAG TLC scanner-III (CAMAG, Muttenz, Switzerland) |
| Mobile phase                  | Cyclohexane/ethyl acetate (90:10, $v v^{-1}$ )      | Cyclohexane/ethyl acetate (90:10, $v v^{-1}$ )      |
| Development distance on plate | 80 mm                                               | 80 mm                                               |
| Development mode              | Linear ascending mode                               | Linear ascending mode                               |
| Sample application rate       | 150 nL s <sup>-1</sup>                              | 150 nL s <sup>-1</sup>                              |
| Densitometry of scanning mode | Absorbance/reflectance                              | Absorbance/reflectance                              |
| Scanning wavelength of FBN    | 296 nm                                              | 296 nm                                              |

**Table S2.** Results of instrumental precision for the simultaneous estimation of CCHO and EOH for sustainable HPTLC technique (mean  $\pm$  SD; n = 6).

| Conc. (ng band <sup>-1</sup> ) | Area $\pm$ SD           | Standard error | CV (%) |
|--------------------------------|-------------------------|----------------|--------|
| 500                            | CCHO<br>20141 $\pm$ 127 |                | 51.85  |
|                                | EOH<br>8298 $\pm$ 63    |                | 25.72  |

**Table S3.** Results of robustness analysis by changing total run length for the simultaneous estimation of CCHO and EOH using the sustainable HPTLC technique (mean  $\pm$  SD; n = 6).

| Conc.<br>(ng band <sup>-1</sup> ) | Total run length (mm) |                       |               | Results         |      |      |
|-----------------------------------|-----------------------|-----------------------|---------------|-----------------|------|------|
|                                   | Original              | Used                  | Area $\pm$ SD | % CV            | Rf   |      |
| 500                               | OHCC                  |                       |               |                 |      |      |
|                                   |                       | 82                    | +2.0          | 18224 $\pm$ 108 | 0.59 | 0.29 |
|                                   | 80                    | 80                    | 0.0           | 18762 $\pm$ 118 | 0.62 | 0.27 |
|                                   |                       | 78                    | -2.0          | 19245 $\pm$ 132 | 0.68 | 0.25 |
|                                   | HOE                   |                       |               |                 |      |      |
|                                   |                       | Total run length (mm) |               |                 |      |      |
|                                   |                       | 82                    | +2.0          | 8302 $\pm$ 56   | 0.67 | 0.40 |
|                                   | 80                    | 80                    | 0.0           | 8366 $\pm$ 65   | 0.77 | 0.38 |
|                                   |                       | 78                    | -2.0          | 8416 $\pm$ 76   | 0.90 | 0.36 |

**Table S4.** Results of robustness analysis by changing the saturation time for the simultaneous estimation of CCHO and EOH using the sustainable HPTLC technique (mean  $\pm$  SD; n = 6).

| Conc.<br>(ng band <sup>-1</sup> ) | Saturation time (min) |      |      | Results         |      |                |
|-----------------------------------|-----------------------|------|------|-----------------|------|----------------|
|                                   | Original              | Used |      | Area $\pm$ SD   | % CV | R <sub>f</sub> |
| CCHO                              |                       |      |      |                 |      |                |
| 500                               | 30                    | 32   | +2.0 | 18164 $\pm$ 121 | 0.66 | 0.27           |
|                                   |                       | 30   | 0.0  | 19114 $\pm$ 133 | 0.69 | 0.27           |
|                                   |                       | 28   | -2.0 | 19871 $\pm$ 143 | 0.71 | 0.26           |
| EOH                               |                       |      |      |                 |      |                |
| 500                               | 30                    | 32   | +2.0 | 8178 $\pm$ 48   | 0.58 | 0.38           |
|                                   |                       | 30   | 0.0  | 8256 $\pm$ 59   | 0.71 | 0.38           |
|                                   |                       | 28   | -2.0 | 8298 $\pm$ 71   | 0.85 | 0.37           |

**Table S5.** Results of robustness analysis by changing the detection wavelength for simultaneous estimation of CCHO and EOH using the sustainable HPTLC technique (mean  $\pm$  SD; n = 6).

| Conc.<br>(ng band <sup>-1</sup> ) | Detection wavelength (nm) |      |      | Results         |      |                |
|-----------------------------------|---------------------------|------|------|-----------------|------|----------------|
|                                   | Original                  | Used |      | Area $\pm$ SD   | % CV | R <sub>f</sub> |
| CCHO                              |                           |      |      |                 |      |                |
| 500                               | 296                       | 298  | +2.0 | 18674 $\pm$ 134 | 0.71 | 0.27           |
|                                   |                           | 296  | 0.0  | 20224 $\pm$ 142 | 0.70 | 0.27           |
|                                   |                           | 294  | -2.0 | 19876 $\pm$ 118 | 0.59 | 0.27           |
| EOH                               |                           |      |      |                 |      |                |
| Detection wavelength (nm)         |                           |      |      |                 |      |                |
| 500                               | 296                       | 298  | +2.0 | 8283 $\pm$ 51   | 0.61 | 0.38           |
|                                   |                           | 296  | 0.0  | 8412 $\pm$ 54   | 0.64 | 0.38           |
|                                   |                           | 294  | -2.0 | 8362 $\pm$ 58   | 0.69 | 0.38           |
